# Supplementary material
Source: publisher figshare collection journal article supplement (https://acs.figshare.com/ndownloader/files/4724383)
Supplement: Supplementary file 1 [file 4724383]

## Supporting Information

Increase of the polydispersity index of SDS/DTAB solutions upon addition of chloride salts (Figure S1); Increase in size of catanionic aggregates after the addition of sodium salts (Figure S2).

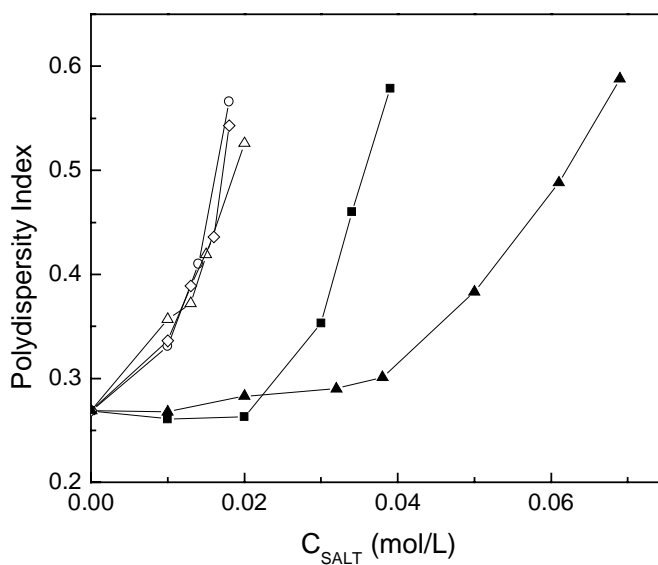

**Figure S1:** Increase of the polydispersity index of SDS/DTAB solutions upon addition of chloride salts: CsCl ( $\circ$ ), RbCl ( $\diamond$ ), KCl ( $\square$ ), NaCl ( $\blacksquare$ ) and LiCl ( $\blacktriangle$ ).

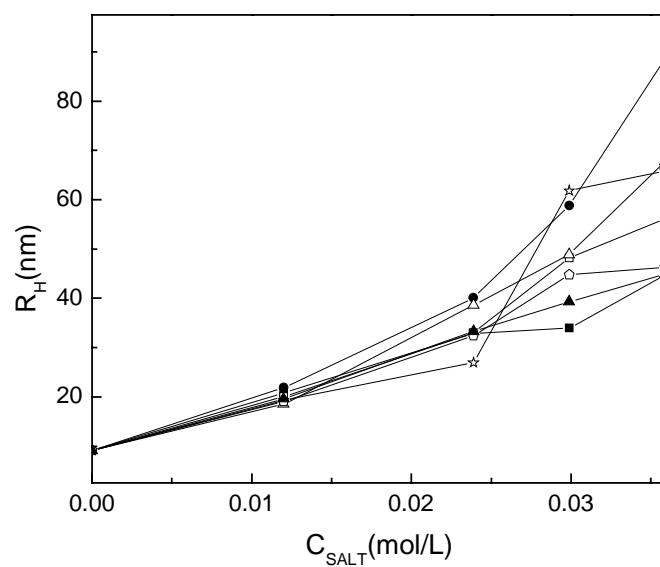

**Figure S2.** Increase in size of cationic aggregates after the addition of sodium salts: NaI (■), NaAc (▲), NaSCN (○), NaBr (□), NaOH (☆), NaClO<sub>4</sub> (◐) and NaCl (●) measured by DLS.
